# Supplementary material
Source: Royal Society of Chemistry journal article supplement (doi:10.1039/d6ew00410e)
Supplement: d6ew00410e1.pdf [file d6ew00410e1.pdf]

## Supplementary Information

### Efficient Removal of H-Acid from Industrial Wastewater via $\text{Ag}_2\text{ZrO}_3$ Nanocatalyst-Mediated Advanced Oxidation and *Pseudomonas* *aeruginosa* Biodegradation

Sakshi R. Barad<sup>a</sup>, G. S. Gaikwad<sup>b</sup>, Atul V. Maldhure<sup>c</sup>, Atul V. Wankhade<sup>a\*</sup>

<sup>a</sup>Department of Chemistry, Visvesvaraya National Institute of Technology (VNIT),  
Nagpur, 440010, India

<sup>b</sup>Department of Chemistry, Priyadarshini Bhagwati College of Engineering, Nagpur,  
440009, India

<sup>c</sup>Water Technology Management Division, CSIR-National Environmental Engineering  
Research Institute, Nagpur 440020, India

Corresponding author: atulvwankhade007@gmail.com

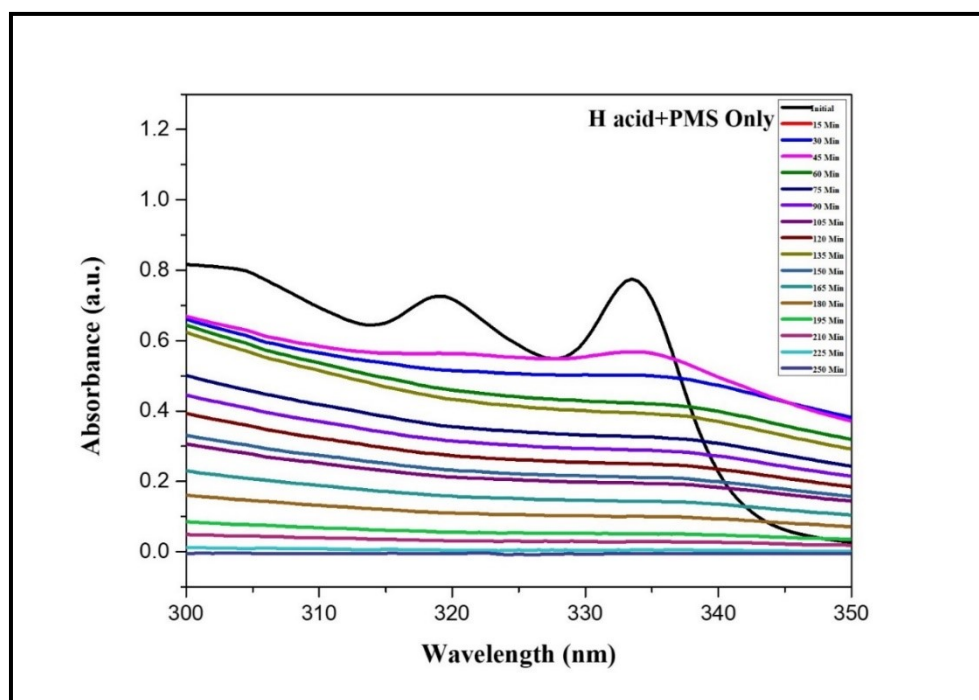

Figure S1. UV-Visible Absorption Spectra of H acid degradation by PMS alone

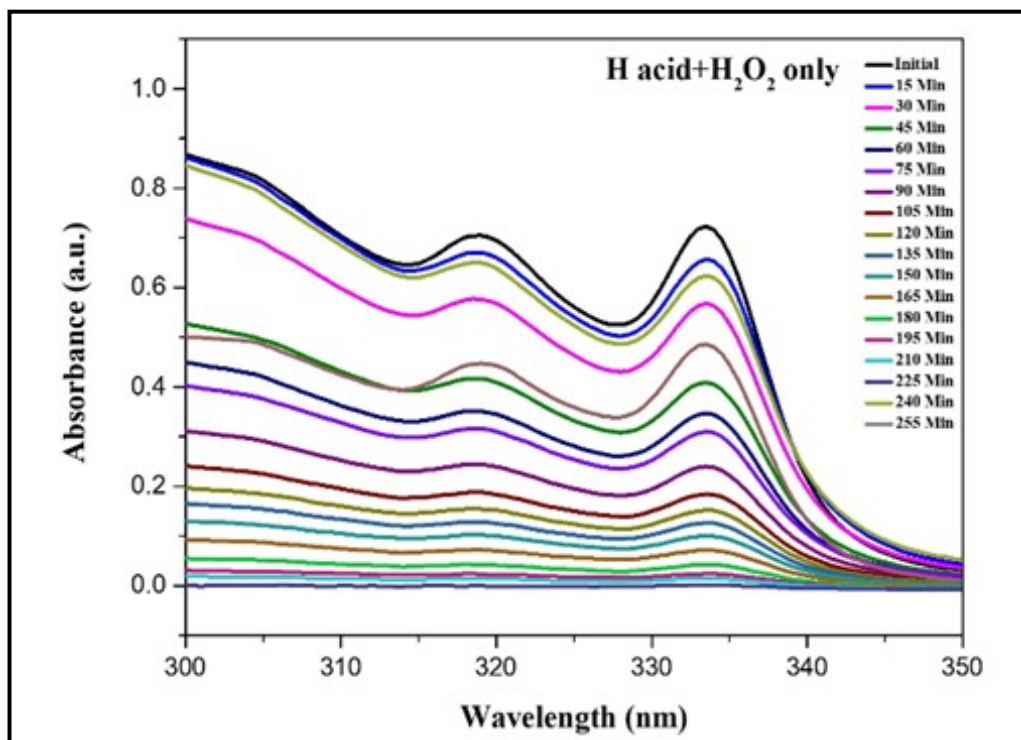

Figure S2. UV-Visible absorption Spectra of H acid degradation by H<sub>2</sub>O<sub>2</sub> alone

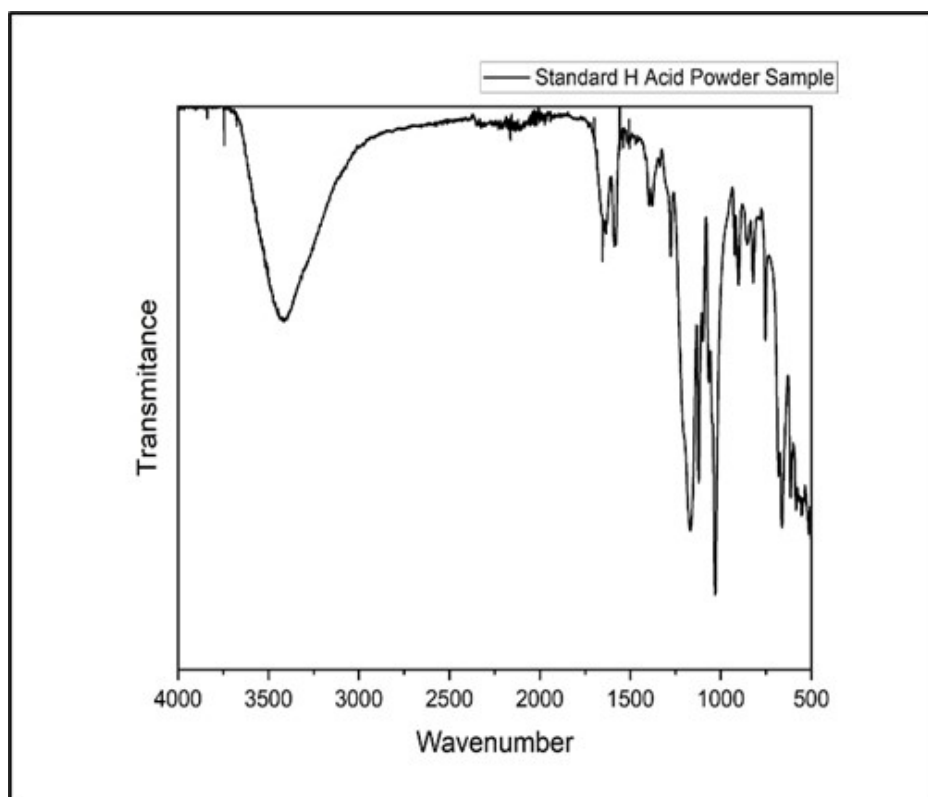

Figure

Figure S3. FTIR Spectra of Standard H-acid Powder Sample

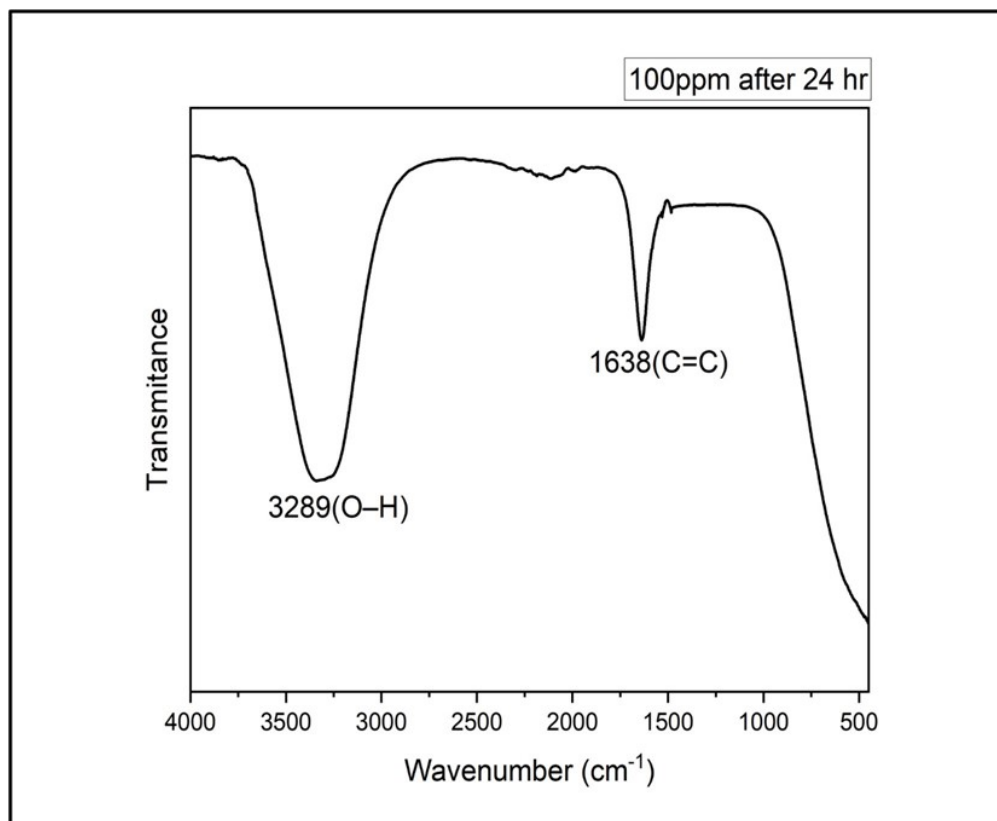

**Figure S4. FTIR Spectra of H-acid degradation by *Pseudomonas aeruginosa***

Fourier-transform infrared (FTIR) spectroscopy was employed to analyse structural modifications in the degraded samples (Figure S4.). Post-biodegradation FTIR spectra displayed a broad peak at 3289 cm<sup>-1</sup>, attributed to O–H stretching vibrations, indicating the presence of hydroxyl or phenolic groups. A distinct peak observed at 1638 cm<sup>-1</sup> may correspond to C=C or C=O stretching, suggesting the formation of unsaturated or carbonyl-containing degradation products. Notably, the characteristic sulfonic group peaks observed around 1040–1180 cm<sup>-1</sup> in the parent compound were absent, confirming desulfonation. Additionally, a weak shoulder near 2350 cm<sup>-1</sup> may indicate trace amounts of CO<sub>2</sub> formation, implying partial mineralization. These FTIR observations are consistent with the proposed microbial degradation pathway and support the formation of low-molecular-weight carboxylic acids and aldehydes as end-products. Overall, the combination of pathway analysis and FTIR data confirms the ability of *Pseudomonas aeruginosa* to efficiently degrade H-acid via enzymatic transformation, ring cleavage, and further

mineralization. These findings highlight its potential application in the bioremediation of sulfonated

aromatic  
pollutants  
from  
industrial  
wastewater  
r.

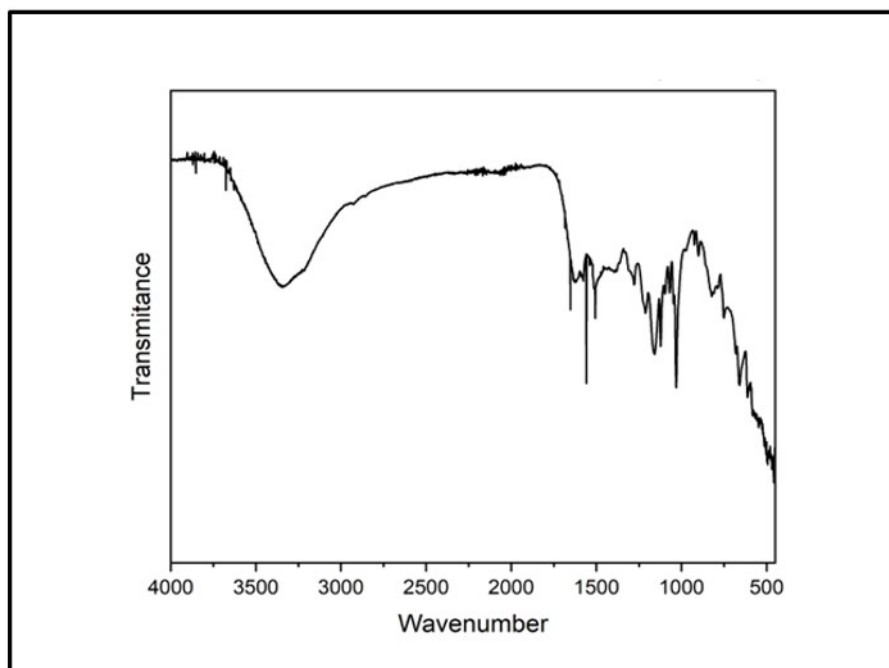

**Fi**  
**gure S5.**  
**FTIR**  
**Spectra**  
**of**  
**Industrial**

### **Effluent**

FTIR analysis of a standard H-acid sample reveals several key characteristic peaks (Figure S5.). A strong, broad band observed in the region of 3400-3200  $\text{cm}^{-1}$  indicates the presence of intact hydroxyl (O-H) and amino (N-H) groups. A peak around 1700-1600  $\text{cm}^{-1}$  is attributed to the stretching vibrations of carbon-carbon double bonds (C=C) within the aromatic rings and any carbonyl (C=O) groups that may be present, confirming the aromatic nature of the compound. The sulfonic acid groups are confirmed by a peak between 1400-1300  $\text{cm}^{-1}$ , which corresponds to the stretching vibrations of the sulfur-oxygen double bond (S=O). Furthermore, peaks in the 1200-1000  $\text{cm}^{-1}$  region are associated with the stretching of carbon-nitrogen (C-N) and carbon-oxygen (C-O) bonds, reinforcing the presence of the amino and hydroxyl functional groups. Finally, the presence of peaks below 900  $\text{cm}^{-1}$ , which are characteristic of out-of-plane C-H bending, confirms the intact naphthalene ring structure of the H-acid molecule.

Industrial effluent is a complex mixture. Therefore, the FT-IR spectrum shows additional peaks from other compounds present. Peaks in the 3000-2800  $\text{cm}^{-1}$  range would indicate the presence of aliphatic C-H bonds, suggesting the effluent contains hydrocarbons or other organic matter from manufacturing processes. Peaks in the 500-600  $\text{cm}^{-1}$  range could point to the presence of metal oxides or salts, which are common byproducts or contaminants in industrial wastewater, potentially from residual raw materials or the process of wastewater treatment itself. These additional peaks highlight the complexity of the sample and the potential presence of various impurities alongside the target compound, H-acid.

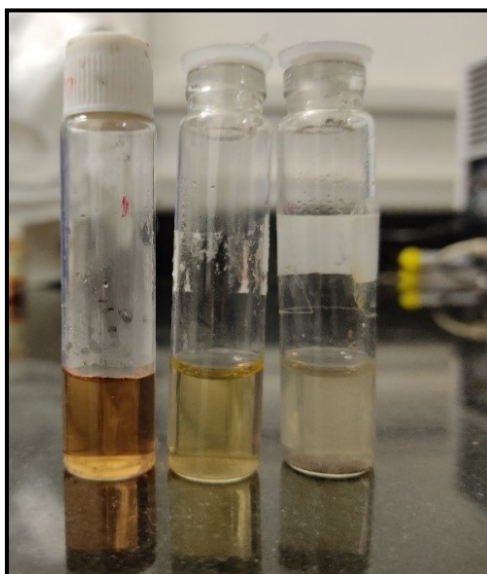

**Figure S6. Treated Industrial Effluent**
